# Supplementary material for: Mutational scanning reveals the determinants of protein insertion and association energetics in the plasma membrane
Source: eLife. 2016 Jan 29;5:e12125. doi: 10.7554/eLife.12125 (PMC4786438; doi:10.7554/eLife.12125)
Supplement: Figure 1—source data 2. — Amino acid positions and substitutions are represented in rows and columns, respectively. (Top) spectinomycin selection (reference) counts. (Bottom) spectinomycin and ampicillin selection. DOI: http://dx.doi.org/10.7554/eLife.12125.005 [file elife-12125-fig1-data2.xlsx]

## Sheet: CLS nucleotide counts
Refference Selection -SPEC	CCG	CTG	TTC	ATC	CCG	GTT	GCA	GTT	ATG	GTT	ACC	GCT	TTT	AGT	GGA	TTG	GCG	TTT	ATC	ATC	TGG	CTG	GCT	ACT	AGT	GGG	GGG
CGT	1	0	11	12	2	273	886	546	3	293	0	3966939	44	17	12	0	868	92	2	5	2	2	4052690	437	23	6	5
CGC	3729	1	5839	1083	1109	1731	6604	1331	3866	1599	3310	7223	3210	2432	5325	9	15573	9385	1340	1015	2184	1134	5421	1975	3	3966	51
CGA	8	0	14	17	2	6	4061644	3	1	3	3	417	4	2	177	0	1492	7	3	0	3	2	754	2	4	3	6
CGG	2445	10	10386	11078	2794	2645	7872	2530	1607	31	63	8302	4590	2381	10588	777	3752318	960	2398	2424	29	22	5679	614	3338	1444	6190
AGA	0	0	5	6	1	0	0	27	12	6	9	45	354	308	15	12	1	374	21	3	699	8	44	8	390	26	20
AGG	913	1	4526	2051	2699	3	5	5611	4114	10	9121	6	874	10	1116	2271	1450	2626	9003	2141	235	1340	5124	1221	4695	1558	996
AAA	1	0	2	2	0	223	3	474	3	406	0	332	13	26	1	6	5	1	0	0	3	2	798	19	10	4	7
AAG	2578	2	5221	82	5	9792	31	84	1535	9351	279	1584	2352	87	63	9061	10618	9	7	1481	533	15	25	5	1667	27	983
GAA	1	2	1	4	0	5	508	1	2	7	0	7	1	0	156	3	8	0	0	0	2	0	1	0	0	1	2
GAG	4950	8197	970	1704	7	3055	2274	981	605	104	2828	13650	652	4939	3955	3756	2445	6	5	2	2656	708	37	2993	8	2368	1690
CAT	0	2	892	13	0	357	1	197	16	1084	10	3	3943669	89	5	987	13	4036808	22	11	2	1	1	14	18	4	1
CAC	769	8093	3983504	3589	1205	3604	2	2094	13113	2090	6447	1	10996	506	6081	5358	8300	5059	13627	2215	27	383	188	2078	1954	4465	6217
GAT	0	0	11	24	3	160	2	1356	0	373	3	281	128	457	1788	16	18	37	14	4	16	0	224	34	909	2561	3876
GAC	4	0	5550	4063	6969	9099	156	3023	2	1580	2874	4638	3586	3463	15529	5209	12507	1037	5066	3163	3588	14	5841	2668	1119	299617	294716
AAT	8	0	6	27	7	10	91	5	0	2	1	4	3	1	3982087	1	3	0	5	2	8	0	6	0	2	920	1705
AAC	14150	890	5989	19911	11888	3052	6014	25005	217	6087	1028	37519	13232	2913	21610	25632	26741	4312	6078	1213	6302	19	1883	2007	4954	3761524	3764040
CAG	1	2	3	1	0	46	1	18	10	56	1	0	37	9	0	12	2	34	0	0	0	9	12	7	15	2	2
CAA	8199	6410	4532	852	9	18	4	3003	3966	3184	1234	24	8519	1208	13	7558	14103	743	114	447	4042	6535	1886	1497	1201	762	6175
AGC	0	1	5	857	0	458	1	312	351	524	8	1	272	532	2	21	2	231	688	1422	2	5	0	444	427	1	2
TCT	0	2	268	3978292	0	514	0	19	389	3426	5062	4	1814	2121	14	13959	4483	1735	4004803	4064180	5	2897	0	4884	1211	1167	4
AGT	0	0	6	1904	0	1	2	0	212	4	3	0	4	1	7	6	2	1	2461	1638	9	3	0	1	4	3	0
TCC	0	1	1	20	1	1	25	2	0	1	0	2	0	0	12	2	1	1	1	3	0	0	1	2	3	2	0
TCA	770	6790	3435	20924	1788	7	10208	1946	236	821	2522	9075	1403	7539	6	190	2496	913	2057	5	166	3466	4949	2274	560	3947	171
TCG	3	927	14	2	1	331	0	71	2	398	0	1	531	27	2	12	3	599	1	26	2	1529	10	15	20	2	4
ACC	12	2194	15358	1785	8	2499	0	55	2690	5436	1018	18	1550	3767	2101	1346	10419	7592	3787	5672	2873	2864	1768	3616	1071	5650	2347
ACG	1	1162	9	2	1	3	0	0	4	3	1	0	3	3	7	4	5	5	3	4	3	1015	0	0	0	2	3
ACT	3059	4051538	6157	42	3236	1980	3	10	1284	3892	88	5	803	1417	1774	3833	9099	4059	817	3300	18	4054246	1324	5	14	3169	1866
ACA	1	12	597	5	0	2	4	0	11	1	3	0	42	0	40	1272	7	40	20	0	0	2	0	1	0	1	2
CCG	10	7394	345	5148	20	3455	2085	661	4868	471	3429	39	10100	8698	2915	3961957	9195	2760	17341	30	1329	3675	102	3	261	572	37
CCA	840	1309	1915	3354	7	2634	579	3845	4033450	2103	957	24	2522	458	668	1413	3558	397	3513	170	4548	1940	4	916	41	1398	3890
CCT	1	0	2	33	0	11	2	7	0	28	1	49	14	265	0	3	1	23	2	0	0	1	20	702	1123	5	0
CCC	1767	462	1563	7539	1	2116	2	2	280	1330	1357	4	9	887	3793	5372	1670	2867	10243	232	2824	2531	5	40	1942	1252	6
TGC	645	1	13	12	737	28	0	40	5	66	1	185	118	7	17	5	15	37	1	2	3	5	235	769	68	2	2
TGT	37436	832	12503	20249	20398	5886	1923	4279	13384	312	7042	36203	14052	1155	7198	12784	63171	6287	4485	7574	2891	4215	6112	5319	10897	4832	2289
GGC	9297	14	13	7	1869	5	102	3	6	5	4	9	14	1	67	11	70	5	6	2	5	6	6	6	6	2	4
GGT	4008710	6925	12109	1196	4049040	5	549	3540	11087	3989	1206	10	9083	4	14827	1140	21304	264	1294	958	2704	5216	3612	2074	2068	16	16
GGG	0	1	1	1	2	2	4	0	0	3	0	0	6	1	1	5	3	1	0	0	0	4	1	1	0	1	4
GGA	2073	1261	953	13	474	6161	886	6	4299	2703	4	3	639	2137	12	5685	2032	2807	0	1	13	324	1257	408	87	872	16
GCG	1	0	2	11	2	71	0	19	1	39	1	17	153	518	10	5	8	36	2	2	2	2	13	23	1637	6	4
GCA	514	544	7387	2761	3483	16142	0	4380	5049	8	3322	3992	17096	591	4777	6471	6119	7333	497	3024	49	3770	3235	1347	3267	2081	3285
GCC	14	1	3	10	2	5	0	3	0	2	1	2	17	0	140	1	8	3	1	2	2	2	2	0	11	1	6
GCT	7020	1125	18	6110	3575	1996	1	538	14	5274	1617	1814	7220	3496	5427	1985	19417	8	2687	491	800	7155	5	2782	10514	1610	916
GTG	0	0	2	5	0	3	1	0	2	2	0	0	0	175	246	3	6	0	1	1	0	0	0	4	421	3	0
GTT	953	5	4963	175	3032	5366	2	2001	1365	4825	95	1783	2911	2324	377	7099	8417	503	73	293	1609	8	2441	3714	1874	4017	3144
GTC	0	0	6	5	0	38	5	26	3	73	7	212	399	22	4	1	14	338	2	12	4	0	793	351	49	0	0
GTA	20	4	680	4683	35	2807	6597	64	3058	7415	3973	11	12396	42	1600	679	6318	1067	6142	704	562	9	870	62	9	27	1248
ATT	5	1	5	9	0	3	301	1	0	3	1	0	7	1	23	1	9	4	32	4	1	0	0	0	8	0	2
ATC	2005	1213	2174	2507	373	2741	27	2743	32	304	3930	73	169	2857	6433	345	11996	2345	389	5868	2055	339	4854	3949	3092	281	22
ATA	0	0	6	4	1	39	0	19	13	48	4	6	40	4039971	1	7	2	30	0	4	0	0	11	187	4047166	7	4
CTG	0	1	970	7317	1	3617	5	2744	4220	1356	4821	512	1805	5882	14	2981	8595	3107	710	239	14	3	7	4697	1279	1709	17
TTA	0	2	7	14	0	20	0	7	2	97	1362	2008	103	109	5	0	7	23	4	14	1	0	743	4050284	151	1	0
TTG	537	313	4878	2493	24	2759	15	3	2945	739	4042142	6037	5205	3948	13	5405	17598	553	9522	1641	13	3103	6	6146	1758	865	6
CTT	6	1	6	6	1	1	791	0	1	3	1967	5	11	1	20	4	20	1	20	8	2	2	0	580	3	2	1
CTC	2544	2141	6770	4388	1749	1058	1654	1374	442	5135	4008	100	10321	2478	4980	40	16419	1641	1369	5591	876	3549	1385	3997	48	182	360
CTA	0	4	5	10	2	4018404	5	4031748	0	4026442	0	249	588	28	16	6	6	1339	2	1	3	6	469	10	118	11	4
ATG	4	3	1321	926	10	1800	5	5000	52	1554	998	27	9137	17	6469	948	6917	3070	2035	410	3	1703	863	9	3	2890	117
TTT	2	0	13	6	1	305	1393	299	0	91	2	3	10	1	598	1	7	3	4	0	7	1	1	0	3	4	1
TTC	2030	7397	2594	1132	3158	930	3124	5548	541	2350	15	8528	6855	2488	2365	9311	6809	3866	62	31	2245	2621	1116	2	7911	1834	3872
TAT	40	703	2454	1206	23	225	444	437	17	22	1008	7816	5934	4352	3179	7633	12346	1361	1710	4	4071147	3380	1937	6	40	1571	2558
TAC	1	0	1	0	0	10	1	11	0	117	3	0	137	9	0	8	10	183	4	1	2	0	18	23	2	0	5
TGG	10	1013	2663	37	1	4	2889	1620	374	11282	406	1	3047	802	417	4255	9966	862	5302	2110	75	6	6	4224	327	7	13
Seleced Selection -AMP	CCG	CTG	TTC	ATC	CCG	GTT	GCA	GTT	ATG	GTT	ACC	GCT	TTT	AGT	GGA	TTG	GCG	TTT	ATC	ATC	TGG	CTG	GCT	ACT	AGT	GGG	GGG
CGT	7	0	1	139	6	778	0	27	0	142	1	0	0	191	13	0	1	0	1	0	0	2	1	1	793	0	0
CGC	37	5	10611	45074	18766	215197	0	6583	5	0	6908	6	18	5	596	2	27	10	19	4	0	4	5	8	6	31	246
CGA	73	0	5	125	5	76	0	4	0	7	2	0	0	0	98	0	0	0	0	0	3	0	0	0	0	0	2
CGG	48135	67	0	82018	5605	187	1	23	0	12751	18	8	6	1334	3511	3	38	0	28	0	194	423	0	3	32	230	373
AGA	0	0	0	16	1	24	0	18	0	3	3	0	0	126	240	0	0	0	3	0	0	0	1	0	229	0	2
AGG	43	1	618	1373	1838	94569	9	24580	68	5403	4465	1	1	7090	172	4	12	0	190	0	98	0	2	3	1246	211	218
AAA	1	0	11	73	0	0	77	0	0	0	1	0	0	1	1	0	0	0	1	0	0	0	0	2	0	0	0
AAG	7421	8	15475	76985	24	23	32105	7	100	894	377	22	0	683	11	1	2	0	3	0	2	1	5	4	13	4	2
GAA	3	0	0	1	0	0	529	2	0	0	0	2	0	0	150	0	0	0	0	0	0	0	0	0	0	2	0
GAG	2842	6	12	185	12	3	200	62	0	7	4	131	0	17	64	2	276	0	6	0	1	3	4	3	3	150	165
CAT	7	0	1	9	0	1	0	7	0	0	0	0	1	0	0	0	0	0	0	0	0	0	1	11	9	0	0
CAC	32107	7	223	48506	13	91	0	141	2	2	10	0	7	47	0	7	23	2	11	9	69	13	2	8	2	2	2274
GAT	0	0	0	2	0	87	2	332	0	224	0	114	1	1	3	0	0	0	0	0	0	0	365	0	3	2	1
GAC	17	0	6	82	10	17	13	27	0	12	19	0	2	15	23	6	11	0	13	3	1	0	12	1	0	1	27
AAT	1	0	9	113	0	0	10	1	0	13	8	0	0	135	0	0	0	0	0	0	0	0	2	636	177	1	0
AAC	21	0	85	51682	1	8	2	25	4	3	324	0	3	14	5	7	16	1	340	117	102	2	4	18	1	9	1
CAG	10422	77	14	123	461	16	843	0	4	5	0	0	0	6	2	4	10	5	2	1	0	109	3	1	1419	2	14
CAA	15	0	0	11	1	1	1	0	0	0	0	0	0	0	0	0	0	0	0	0	0	0	0	0	0	0	4
AGC	0	0	532	20359	25	112	4	29959	8	0	1069	1	1	2242	15	5	21	3	437	95	0	0	4	14	964	327	3
TCT	1	1	0	27	0	0	5	67	0	0	3	292	100	6	22	0	3	149	18	0	0	0	493	241	6	0	0
AGT	0	0	3	46	0	361	0	344	0	62	29	0	0	4940901	1	0	0	0	4	0	0	0	0	52	5231346	0	1
TCC	136	19	300	4336	51	7	12745	8344	4	67	3199	0	17	93	60381	0	88	4	66442	6	1396	0	94	7	0	6	7
TCA	15	0	0	27	0	0	338	11	0	0	0	1	0	0	363	0	2	0	45	0	3	0	0	0	0	0	0
TCG	10004	0	6	11989	313	15	7	13	7	1	334	98	15	95	7783	148	723	0	100	20	85	0	4	10	427	1	8
ACC	6659	0	6177	1637	83	46	11	4	4	2	5039414	12	5	35343	34	5	431	1	990	257	1	5	8	1974	146	5	1
ACG	42353	1	21	2708	1193	11	326	8618	137	26	801	2	4	16810	24892	2	619	7	105	22	1	7	115	1981	2	0	5
ACT	8	0	1	16	1	1	0	65	1	2	1620	1370	0	686	31	0	12	0	2	0	0	0	446	5209010	25	0	0
ACA	53	0	5	12	1	0	602	7	0	0	1716	1	0	17	88	0	6	0	7	2	0	0	0	777	0	0	0
CCG	4932523	241	37	35	5086793	6	10	54	21	6	6	0	5	4	69	6	1043	2	8	4	3	189	5	3	4	3	24
CCA	9332	2	0	5	2121	0	53	0	0	0	1	0	0	0	0	0	2	0	1	0	0	0	0	6	0	0	1
CCT	735	1	0	2	1065	2	0	1	0	0	0	30	0	1	1	0	7	0	0	0	0	0	82	627	0	0	0
CCC	29590	1	769	12918	33279	28	5	290	18	4	361	21	6	12	30	10	1000	4	93	28	1	5	90	265	12	36	145
TGC	3	7	131	556	964	58	2	10245	10	0	21234	0	1	42	578	3	2091	2	967	2	68	1	10711	5	767	320	23
TGT	0	0	0	46	2	17	0	71	0	1	179	80	61	863	9	2	3	116	135	0	247	0	61	0	261	18	12
GGC	8	0	81	13098	18310	949	3	1024	0	6	17	3	2	269	6499	4	37	0	172	3	11	30	94	4	11	194223	130492
GGT	7	0	1	138	15	1393	0	2956	0	265	0	26	1	716	2485	0	0	1	6	0	1	0	76	1	516	2684	3483
GGG	44385	3	10	105175	22826	1103	17	154200	0	83	6	210	9	344	98627	21	164	5	5141	1	237	7	5	1	3976	5011817	5013464
GGA	45	0	0	143	6	7	49	74	0	0	0	0	0	1	4828730	0	0	0	3	0	0	0	1	0	0	894	1178
GCG	25574	0	520	35822	1241	40	4144	5153	1	1	10	4955	8	15956	122969	1	4840399	2	13377	85	12	1	2084	2	142	44	7175
GCA	48	0	3	64	8	0	5191971	9	0	0	16	437	0	17	1127	0	1740	0	25	0	0	0	699	0	0	0	1
GCC	7044	0	1487	290	17468	15	3573	83	74	212	56765	3557	2	54832	40590	0	3339	14	26774	101	860	4	5239	86	0	1313	4
GCT	8	0	1	42	5	165	827	482	0	141	16	5192569	0	349	175	0	1229	0	17	0	0	0	5223024	171	0	2	2
GTG	3742	33	8	864	12779	2091	2530	4204	152	192	7	35213	34	32304	388	369	36274	6	157	0	8	66	2860	0	4804	6995	20652
GTT	3	3	0	3	5	4868123	1	4969701	1	5204965	0	608	208	306	3	1	65	722	1	0	0	0	444	2	66	11	15
GTC	4	17	215	813	16	4070	3	1569	19	855	45	1	13	108	12538	1	34401	9	588	214	2	3	79	5	0	1495	215
GTA	5	0	0	0	3	326	947	331	0	180	0	10	0	6	523	0	25	0	0	0	0	0	1	0	1	0	5
ATT	0	0	2	730	0	420	0	395	366	402	17	0	317	894	2	0	24	110	896	1024	0	2	0	354	499	2	4
ATC	1	13	216	4627570	0	24	0	135	907	2760	29731	0	17211	3356	56	27	73973	4	4958191	5226483	0	4	0	20906	1	58	18
ATA	0	0	1	1528	0	2	0	8	184	11	3	0	5	3	7	1	26	0	2411	1832	0	1	0	12	1	1	3
CTG	39416	5113928	5075	519	27648	13060	0	6	274	5081	2	0	3886	1872	12787	3663	96969	1313	4941	3381	3	5244463	1412	1	2	14087	18051
TTA	0	35	397	42	0	24	0	6	27	2	10	0	49	20	96	1449	11	37	36	0	1	0	1	0	1	3	3
TTG	15	3862	116	13521	26	637	2	4285	67538	14	13314	15	96349	75003	10279	5245683	36020	232	37887	1	287	3439	4	0	5042	12239	45
CTT	6	1217	6	5	4	642	0	31	6	310	0	0	291	22	12	1	54	256	11	9	0	1878	24	29	14	11	10
CTC	28	3015	18856	1783	52	1835	0	36	4371	2263	7135	0	3685	680	979	194	87044	179	31894	19167	49	724	4425	13625	1	1578	23694
CTA	29	1369	18	5	6	9	0	0	0	13	1	0	1	1	27	2	42	0	16	5	0	1384	6	8	0	1	15
ATG	73	101	151	2434	17	2061	5	12832	5101985	8259	103	34	18	5809	31	461	17355	2	8438	90	112	354	1	4	66	2997	12139
TTT	0	26	1096	60	0	578	0	426	135	6938	69	0	5119263	608	20	525	62	5238724	64	0	0	0	19	9	53	10	1
TTC	13	128716	5189398	72612	3	43581	2	5143	76681	482	31213	2	11453	4261	13637	89	13285	11052	2662	156	1	1	85	1882	6	101	2995
TAT	0	0	0	0	0	0	0	5	0	0	0	0	44	6	0	0	0	76	4	0	2	0	1	4	1	1	0
TAC	11	11	138	85	0	2	1143	19	7	20	17	0	2	646	46	5	29	1	5369	5	4	0	6	348	1	0	2
TGG	76	1	228	14316	41	45	0	70	4	25	32502	13290	20	47932	481	323	4075	76	83983	0	5247503	2	6	0	28	1191	15888

## Sheet: CLS amino acid counts 
AA pos(In sequence)	295	296	297	298	299	300	301	302	303	304	305	306	307	308	309	310	311	312	313	314	315	316	317	318	319	320	321
Refference Selection -SPEC	P	L	F	I	P	V	A	V	M	V	T	A	F	S	G	L	A	F	I	I	W	L	A	T	S	G	G
R	8929	1793	12994	9527	10637	24770	5	7262	6783	10628	5288	7956	28660	7783	11566	16309	42280	8255	3418	6073	2644	11658	7328	8256	19482	8101	7793
K	813	7110	3610	22026	1875	10	10705	2044	264	862	2652	9507	1461	7964	19	204	3024	955	2174	12	171	3628	5180	4051	590	7307	182
D	2715	2	5478	87	5	10531	36	675	1608	10298	292	2043	2485	123	75	9522	11913	13	7	1563	554	18	1066	26	1751	51	1102
E	5197	8582	1024	1777	9	3199	3052	1037	641	121	2982	14301	688	5213	4362	3957	2794	8	5	6	2810	748	45	3176	10	2481	1827
H	8604	6737	4781	895	11	69	7	3164	4179	3402	1297	27	8961	1283	15	7958	14867	806	123	472	4226	6837	1986	1545	1283	813	6421
N	1848	488	1656	7969	1	2218	4	10	300	1420	1544	58	29	1231	3966	5658	1764	3053	10790	1178	2984	2666	30	962	3225	1310	8
Q	2362	1342	1008	17	611	6461	923	8	4510	2822	4	3	680	2235	15	5958	2152	2950	2	4	17	388	1317	438	91	920	25
S	2178	1289	4085	15298	472	9699	7360	5886	7727	9627	13380	871	15577	1620437	8492	4321	29655	7295	7819	10970	2779	359	9164	9791	1620437	2144	1403
T	3381	2584	12231	7322	2091	4030	2655	1442	3579	6265	1620437	8625	16395	6880	5268	5763	35937	2312	12124	7931	937	6993	2341	1620437	2083	1102	383
P	1620437	8204	25829	22536	1620437	6202	2745	8238	25721	4593	8744	38226	24404	1223	23191	14608	93400	6888	6092	9715	5919	9993	10474	8751	13626	5042	2424
C	952	1	4805	2164	2842	4	5	5895	4323	16	9589	55	1341	361	1202	2405	3760	3271	9501	2257	1160	1426	5411	1277	5436	1842	1158
G	14892	939	12141	25190	19793	12990	6577	31109	229	8598	4097	44589	17811	7243	1620437	32399	47143	5680	11718	8219	10479	3423	8460	4897	7565	1620437	1620437
A	6535	11	17061	12775	4177	4925	1620437	4764	5748	2031	3562	1620437	8227	5081	16845	814	1620437	10959	3953	6684	2327	1219	1620437	3243	3523	5641	9797
V	2124	7795	4190	2234	3326	1620437	4826	1620437	676	1620437	1085	9268	17506	2682	10001	11213	14728	9044	2280	653	2372	4647	2641	24	8419	5223	5570
I	0	6	311	1620437	1	1067	3	368	1096	4236	5398	5	2226	2887	26	14714	4772	2136	1620437	1620437	20	3064	0	5599	1864	1220	15
L	3296	1620437	23937	7452	3517	8710	2203	839	9475	10696	4788	72	13798	14571	7149	1620437	34927	15963	23963	9719	4507	1620437	3999	3838	1456	9772	18804
M	877	1478	2019	3571	11	2775	606	4023	1620437	2208	1016	25	2670	491	691	1712	3776	416	3743	260	4743	2276	5	969	48	1460	4034
F	810	8453	1620437	3794	1283	4215	3	2426	13771	3389	6748	4	1620437	635	6376	7008	8744	1620437	14415	2489	31	407	214	2196	2059	4665	6580
Y	11	1056	2818	40	1	15	3054	1721	394	11942	439	1	3367	851	440	4477	10556	1146	5544	2216	87	7	31	4448	345	8	21
W	47	728	2576	1258	26	237	462	461	18	24	1060	8161	6209	4585	3325	8182	15025	1427	1799	10	1620437	3565	2241	6	48	1885	3255
Seleced Selection -AMP	P	L	F	I	P	V	A	V	M	V	T	A	F	S	G	L	A	F	I	I	W	L	A	T	S	G	G
R	50642	101	11757	134613	27545	325409	12	32694	113	19110	11914	16	26	9341	4857	10	3682	11	261	8	329	582	11	22	2942	544	928
K	7761	8	16217	80687	30	25	33604	8	112	933	413	22	0	729	16	1	11	0	4	0	2	1	5	13	16	5	2
D	17	0	6	94	11	118	16	470	1	274	25	170	3	23	39	8	16	0	21	3	1	0	499	2	4	16	56
E	2970	7	12	207	15	4	922	76	1	7	5	142	0	20	267	2	377	0	9	0	1	3	6	3	3	177	175
H	33566	8	241	50817	15	100	0	154	2	3	13	0	8	54	0	7	30	2	14	9	74	14	5	23	14	3	2370
N	23	0	100	54265	1	9	12	31	4	16	456	0	5	177	6	7	20	1	382	130	107	3	6	831	223	12	2
Q	11047	80	19	151	607	18	899	0	4	6	0	0	0	6	3	4	12	5	2	1	0	135	3	1	1473	3	19
S	10665	22	896	38519	434	535	13714	40609	20	138	4900	441	156	1156096	71680	166	954	173	70268	164	1549	0	694	382	1156096	360	42
T	51341	1	6472	4624	1588	62	1027	9089	153	31	1156096	1480	12	55380	26197	7	1149	9	1193	365	2	14	625	1156096	189	6	6
P	1156096	280	859	13564	1156096	46	78	360	40	11	438	59	12	19	108	16	2230	6	115	40	4	227	201	1091	16	39	178
C	4	12	154	641	1020	87	3	10816	10	1	22408	86	91	967	630	6	2198	151	1207	3	377	1	11215	5	1121	422	74
G	46522	3	101	124058	43065	3766	81	165558	0	411	25	257	16	1476	1156096	28	337	6	5575	6	336	40	198	7	4848	1156096	1156096
A	34175	0	2109	37799	19614	244	1156096	6086	78	384	59478	1156096	12	74642	172293	1	1156096	17	42097	205	921	8	1156096	318	147	1415	7461
V	3902	68	294	1827	13413	1156096	3673	1156096	211	1156096	60	37461	371	34326	14130	483	74077	959	819	252	10	96	3577	7	5128	8904	21927
I	2	17	250	1156096	0	478	1	590	1594	3339	31149	0	18327	4546	65	30	77347	144	1156096	1156096	0	8	0	22282	671	64	35
L	41272	1156096	25844	16743	29040	17018	2	4580	75697	8034	21417	16	109098	81455	25275	1156096	230085	2189	78336	23727	407	1156096	6126	14258	5267	28971	43804
M	75	132	159	2616	21	2152	5	13418	1156096	8617	107	38	24	6097	33	569	18206	2	8877	108	120	452	1	7	77	3126	12601
F	14	134873	1156096	76114	3	46281	2	5855	80447	7807	32694	2	1156096	5096	14297	740	13939	1156096	2906	186	1	1	115	1971	65	120	3127
Y	12	12	150	93	0	2	1206	29	7	24	18	1	54	699	52	5	30	93	5626	5	7	0	7	360	2	1	4
W	83	1	243	15009	44	52	0	83	8	25	33995	13886	21	50282	507	479	4276	81	87830	0	1156096	3	13	0	32	1381	16538

## Sheet: GpA amino acid counts 
Refference Selection -AMP	L	I	I	F	G	V	M	A	G	V	I	G	T	I	L	I
R	451	6662	2675	3290	2055	226	347	111	590	47	129	154	40	131	222	0
K	30	2669	815	2387	1560	103	1226	115	1460	56	74	249	188	1859	110	2
D	154	1763	342	449	89	40	21	28	40	47	26	61	966	229	159	3
E	87	922	551	1860	292	52	4	23	193	2	108	234	720	774	543	0
H	63	961	708	398	628	171	17	815	401	28	25	522	374	105	314	1
N	96	1739	312	561	653	129	59	28	732	52	22	284	536	162	434	22
Q	127	1686	849	1201	306	35	12	344	507	6	62	352	854	319	302	0
S	369	4127	1512	1331	929	2637	2492	2341	2854	910	1342	1321	1344	731	1268	4
T	76	3410	1131	1579	686	1418	1870	2136	1967	733	704	825	26133	257	927	4
P	145	1914	1614	2274	2484	110	81	40	1658	74	71	1261	1354	1068	2981	0
C	244	1756	839	380	534	965	1074	488	771	211	433	481	885	202	524	0
G	907	6512	3767	2897	26133	3827	2378	3073	26133	1843	4017	26133	5939	4051	2435	0
A	647	5179	1174	1566	761	1657	2074	26133	2273	883	1092	904	745	900	994	0
V	390	3653	1373	989	1083	26133	1616	896	1504	26133	1141	956	1803	474	874	8
I	55	26133	26133	446	529	1386	41	359	1433	216	26133	191	685	26133	172	26133
L	26133	2717	2167	901	808	1108	2791	2077	1945	685	879	993	2542	974	26133	9
M	183	1377	354	466	451	358	26133	9435	393	111	991	450	653	226	163	22
F	62	658	441	26133	388	686	3861	754	1118	343	277	210	1429	226	888	6
Y	87	1158	450	215	620	1234	1898	772	557	365	475	431	132	154	182	0
W	206	1077	1164	302	1801	624	945	725	325	264	799	492	1220	608	873	0
Seleced Selection -CAP	L	I	I	F	G	V	M	A	G	V	I	G	T	I	L	I
R	1115	88	382	8454	128	29	63	23	38	11	40	162	15	42	34	0
K	49	17	89	5354	10	4	25	11	30	0	0	28	58	62	9	3
D	69	9	7	14	6	9	9	12	4	7	2	65	8	5	11	2
E	11	4	18	51	98	33	33	11	46	3	4	19	12	15	58	0
H	578	9	11	511	28	12	5	37	345	7	5	29	17	105	16	1
N	728	12	7	257	182	19	1	23	24	13	6	11	18	40	104	36
Q	617	34	6	1246	13	4	2	3	30	10	2	28	13	54	127	0
S	2914	46	379	2555	703	32	29	124	830	13	9	2504	3021	670	1585	9
T	267	522	548	1638	207	19	26	627	1361	11	39	273	44311	345	463	14
P	266	20	23	78	48	24	7	55	62	10	1	42	39	32	235	0
C	1600	291	431	848	206	353	719	2098	1066	80	45	342	173	834	528	0
G	4740	100	299	2305	44311	194	64	96	44311	135	83	44311	3560	2501	1084	1
A	3087	1192	1621	9958	1528	1617	78	44311	2320	214	30	2615	274	1179	1209	0
V	110	3440	1325	1793	115	44311	2851	6438	2020	44311	795	234	23	647	994	16
I	12	44311	44311	902	112	2017	276	3763	3040	1244	44311	271	8	44311	33	44311
L	44311	8066	4323	7145	968	2536	13455	26442	3770	621	5112	6476	108	5297	44311	19
M	551	2700	711	1088	86	1140	44311	4246	1330	393	473	1811	390	1310	319	79
F	73	8785	691	44311	227	7458	4600	4431	2787	626	466	1638	56	795	2129	9
Y	509	150	14	961	71	144	76	188	1881	14	8	9	5	110	108	4
W	1716	2104	625	771	387	1076	118	3531	1059	19	198	1002	117	927	141	0

## Sheet: Erbb2  amino acid counts
Refference Selection -AMP	L	T	S	I	I	S	A	V	V	G	I	L	L	V	V	V	L	G	V	V	F	G	I	L
R	744	285	533	571	793	843	733	546	279	420	662	982	434	307	506	417	283	759	1158	567	9	2298	543	193
K	228	549	227	308	693	297	293	223	674	381	385	713	324	415	503	711	344	909	793	646	0	1773	672	323
D	361	94	124	13	278	142	32	14	11	92	1	108	0	1	169	57	135	234	10	211	0	189	65	177
E	160	198	40	208	239	162	103	105	197	178	210	231	27	281	50	14	141	314	192	456	0	545	179	149
H	153	106	136	109	399	195	216	85	241	108	95	111	263	98	25	27	376	182	146	91	0	306	24	42
N	433	103	241	104	396	254	108	23	133	198	183	555	87	142	169	37	55	242	268	222	0	1112	78	162
Q	132	131	219	207	250	64	139	186	180	214	355	190	190	50	158	0	69	40	310	259	0	596	463	41
S	454	464	14254	521	578	14254	301	76	322	358	679	608	325	329	288	87	353	584	796	582	35	1891	238	345
T	147	14254	129	171	431	190	269	275	131	374	268	445	305	361	259	105	48	250	104	565	0	793	394	419
P	400	542	756	711	1204	390	393	975	1253	730	1633	1038	256	708	981	608	1074	556	513	999	0	1337	909	677
C	776	435	137	428	212	171	374	241	276	169	87	131	26	85	130	68	193	236	172	375	2	723	191	27
G	589	932	495	1582	872	297	655	644	472	14254	1221	947	283	374	813	549	344	14254	1300	1153	0	14254	494	656
A	104	252	88	528	514	124	14254	130	422	338	163	361	58	158	37	106	82	208	172	272	0	1379	308	233
V	241	438	271	322	439	121	137	14254	14254	370	200	243	461	14254	14254	14254	81	988	14254	14254	1	1310	522	266
I	317	298	195	14254	14254	83	197	65	312	135	14254	330	473	123	67	152	134	228	127	243	1	1083	14254	98
L	14254	883	419	608	890	316	754	235	621	394	403	14254	14254	721	223	323	14254	605	723	398	11	2369	437	14254
M	62	64	152	31	37	0	32	10	18	171	29	1	6	188	2	0	13	59	179	38	0	239	133	52
F	463	660	702	449	219	181	426	925	350	481	468	285	459	1113	368	566	432	791	492	460	14254	1465	923	1168
Y	277	97	90	19	372	171	82	30	201	142	57	64	541	105	23	0	125	303	156	82	2	430	118	28
W	364	314	64	208	388	15	223	377	201	89	186	71	95	137	0	40	1	220	137	268	0	442	92	56
Seleced Selection -CAP	L	T	S	I	I	S	A	V	V	G	I	L	L	V	V	V	L	G	V	V	F	G	I	L
R	1533	1074	1047	484	87	50	262	0	2	4	9	9	10	0	38	148	3	4	5	8	0	11	3	283
K	960	357	483	65	35	70	218	0	0	1	0	1	1	0	68	187	6	0	1	6	0	9	0	186
D	499	310	51	93	96	208	0	6	1	91	0	0	1	21	19	9	0	2	2	43	0	19	2	0
E	274	191	212	357	239	114	260	6	1	70	57	9	4	7	58	25	35	49	101	420	0	0	1	102
H	450	263	413	94	202	553	300	0	90	154	6	116	38	12	63	82	453	25	88	151	0	0	1	48
N	718	165	191	123	72	449	126	13	6	349	84	57	25	0	214	36	58	138	80	19	0	0	2	27
Q	768	461	1063	465	170	53	386	95	5	241	112	33	96	29	99	71	120	2	485	338	0	0	0	131
S	1237	1041	22049	987	582	22049	458	1150	799	555	619	563	122	787	494	292	356	1408	1342	665	46	4	17	850
T	870	22049	953	744	912	996	351	455	424	940	329	1053	346	568	475	129	324	30	258	503	0	0	186	383
P	666	1562	2351	910	258	915	354	25	1	1019	74	26	9	281	9	50	11	2	9	8	0	0	3	124
C	1782	617	274	736	237	311	883	598	620	518	490	402	69	668	206	120	136	583	65	689	8	30	66	292
G	972	1895	1527	2078	845	809	1763	961	574	22049	968	1650	270	885	962	1627	441	22049	293	1939	0	22049	3	493
A	335	734	443	969	290	413	22049	528	556	827	338	614	0	352	238	428	170	359	108	597	0	7	134	254
V	635	1154	263	624	1164	428	770	22049	22049	700	445	845	301	22049	22049	22049	180	9	22049	22049	9	20	482	713
I	1006	816	303	22049	22049	206	167	86	467	169	22049	721	640	16	213	153	139	1	366	308	3	1	22049	342
L	22049	1203	720	2080	2029	814	2666	779	1848	1888	804	22049	22049	2727	581	736	22049	945	873	1227	20	1	372	22049
M	306	205	178	60	101	0	182	3	15	643	37	4	7	135	10	0	87	71	128	14	0	0	231	175
F	1113	1994	2373	552	958	970	995	1963	1286	1862	1171	945	633	3563	868	1216	834	599	1028	798	22049	1	1138	2101
Y	891	582	301	11	1063	527	206	205	419	67	41	93	567	27	0	0	91	4	12	217	5	0	14	116
W	731	480	193	306	805	0	163	891	446	305	30	131	77	421	55	194	1	35	25	431	0	6	2	59
