# Supplementary figures and images for: Mutational scanning reveals the determinants of protein insertion and association energetics in the plasma membrane
Source: eLife journal article supplement (doi:10.7554/elife.12125), 2016-01-29

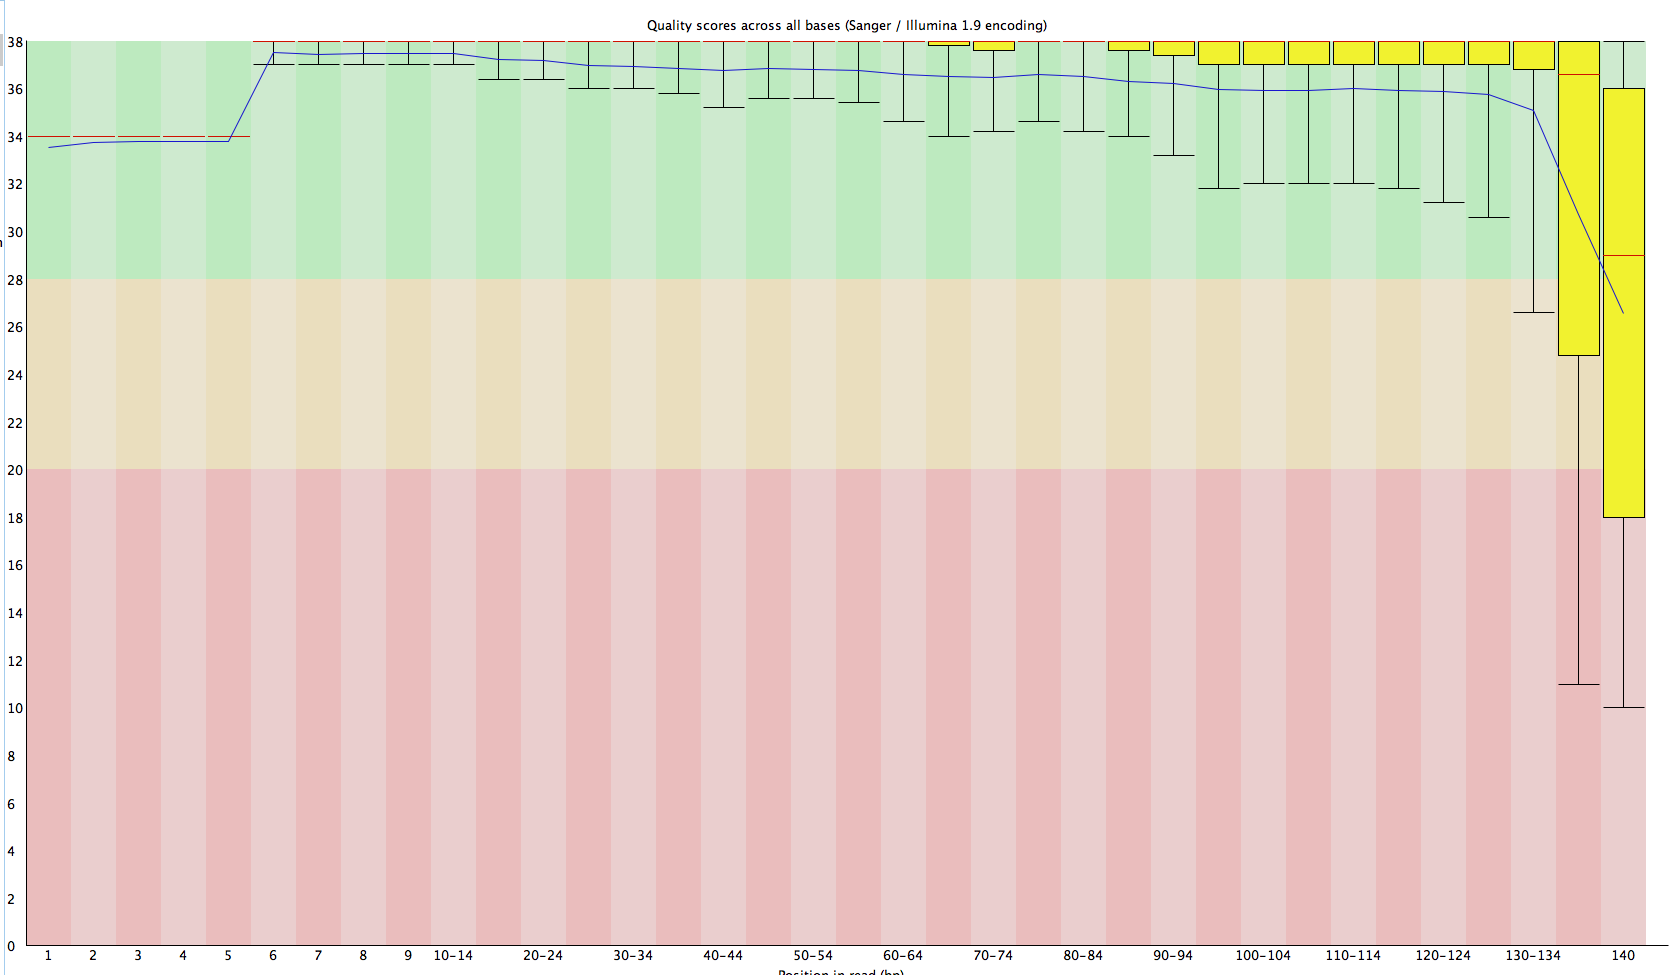

Supplement: supp [file elife_poa_e12125_Figure_1_source_data_1.docx]
